# Supplementary material for: Resilience of Epiphytic Lichens to Combined Effects of Increasing Nitrogen and Solar Radiation
Source: MDPI journal article supplement (doi:10.3390/jof7050333), 2021-04-26
Supplement: s1 [file s1]

# Supplementary Material - Resilience of Epiphytic Lichens to Combined Effects of Increasing Nitrogen and Solar Radiation

Lourdes Morillas <sup>1,\*</sup>, Javier Roales <sup>2,1</sup>, Cristina Cruz <sup>1</sup> and Silvana Munzi <sup>1,3</sup>

<sup>1</sup> Centre for Ecology, Evolution and Environmental Changes, Faculdade de Ciências, Universidade de Lisboa, Campo Grande, Bloco C2, 1749-016 Lisbon, Portugal;

<sup>2</sup> Departamento de Sistemas Físicos, Químicos y Naturales, Universidad Pablo de Olavide, Ctra. Utrera Km 1, Seville, Spain;

<sup>3</sup> Centro Interuniversitário de História das Ciências e da Tecnologia Faculdade de Ciências, Universidade de Lisboa, Campo Grande, 1749-016, Lisbon, Portugal

\* Correspondence: lmorillas@fc.ul.pt (L.M.)

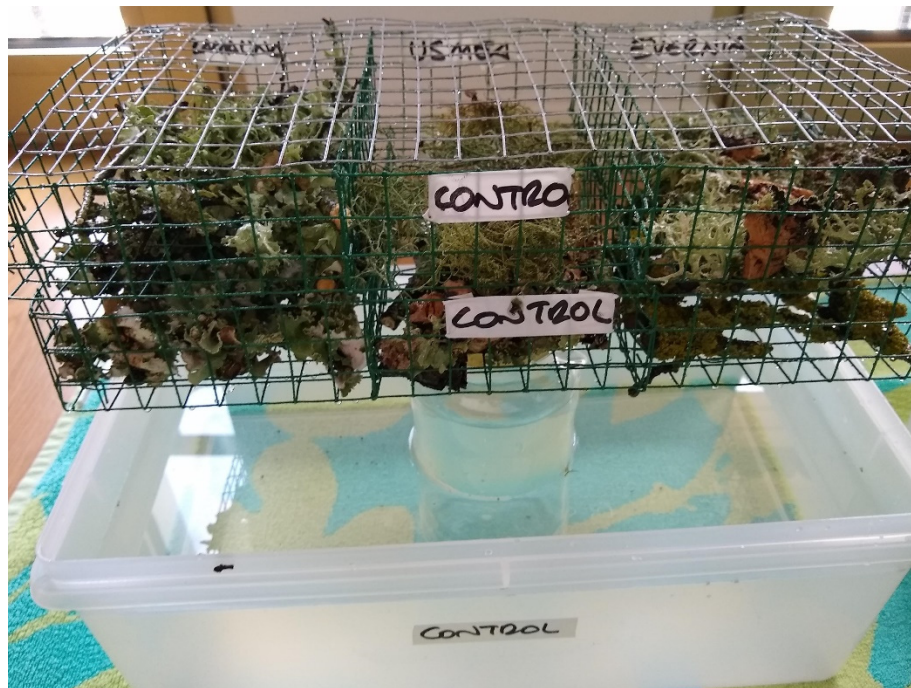

**Figure S1.** Setup for the nitrogen treatment. Lichens were housed in custom-built wire mesh cages that prevented their flotation on the solutions.

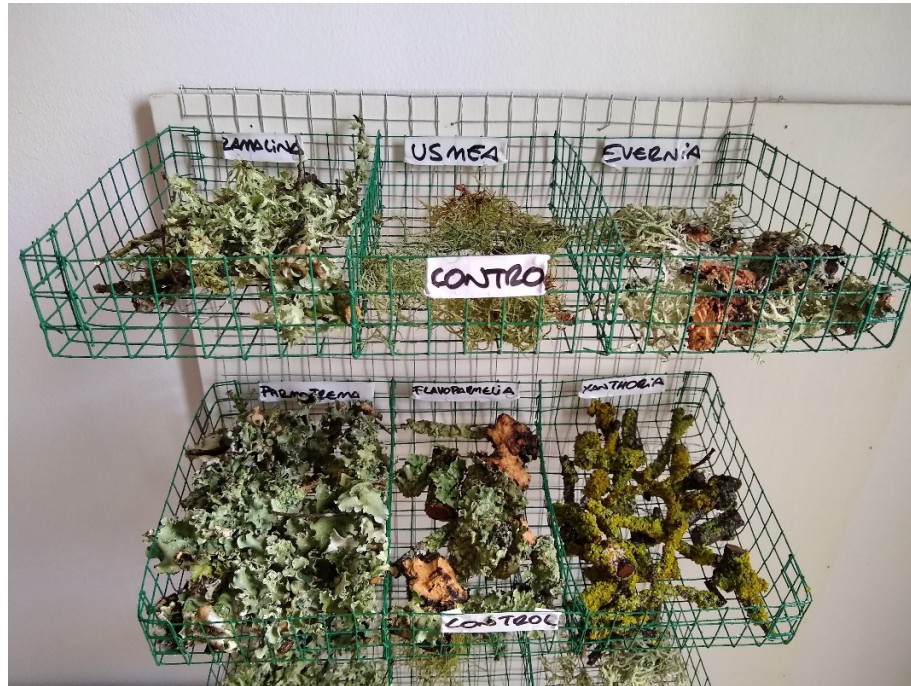

**Figure S2.** Shelves containing the lichens during the experiment. Lichen samples were placed in wire mesh shelves in a well-aerated location, which ensured enough drying before the subsequent immersion and hence prevented rotting of the lichen thalli or the substrate.

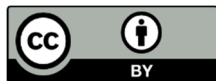

© 2021 by the authors. Submitted for possible open access publication under the terms and conditions of the Creative Commons Attribution (CC BY) license (<http://creativecommons.org/licenses/by/4.0/>).
